# Supplementary figures and images for: Sensitive luminescent paper-based sensor for the determination of gaseous hydrogen sulfide
Source: Royal Society of Chemistry journal article supplement (doi:10.1039/c4ay02952f), 2015-01-01

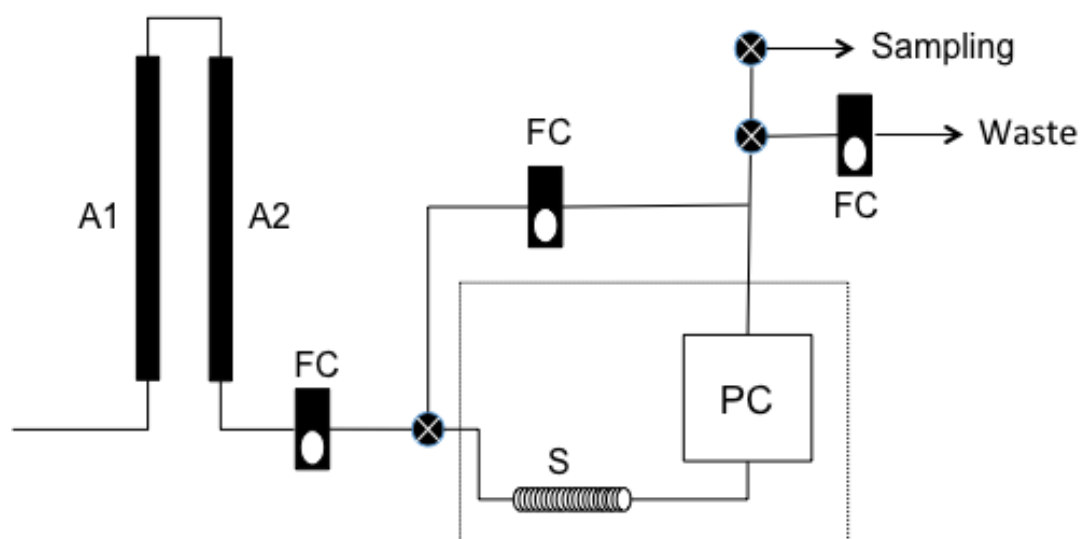

Figure S1. Standard gas generation system.

Supplement: c4ay02952f1.pdf [file c4ay02952f1.pdf]
